# Supplementary material for: End-point rapid detection of total and pathogenic Vibrio parahaemolyticus (tdh+ and/or trh1+ and/or trh2+) in raw seafood using a colorimetric loop-mediated isothermal amplification-xylenol orange technique
Source: PeerJ. 2024 Jan 3;12:e16422. doi: 10.7717/peerj.16422 (PMC10771086; doi:10.7717/peerj.16422)
Supplement: Supplemental Information 7 [file peerj-12-16422-s007.xlsx]

## Sheet: Final proved
Sample code	Sample type	Storaged status	Collection place	Location		PCR assay			LAMP-XO assay			qPCR assay
					Year	species- specific gene	virulence genes		species- specific gene	virulence gene		species- specific gene	virulence gene		Genotype based on qPCR results
						toxR	tdh	trh1/trh2	rpoD	tdh	trh1/trh2	rpoD	tdh	trh1/trh2
VP7	Pacific white shrimp	chilled	fresh market	Chatuchak	2018	+	-	-/-	+	-	-/-	+	-	-/-	tdh-/trh1-/trh2-
VP11	Oyster	chilled	fresh market	Ratchathewi	2018	+	-	-/-	+	-	-/-	+	-	-/-	tdh-/trh1-/trh2-
VP16	Pacific white shrimp	chilled	fresh market	Ratchathewi	2018	+	-	-/-	+	-	-/-	+	-	-/-	tdh-/trh1-/trh2-
VP17	Clam	chilled	fresh market	Lat Krabang	2018	+	-	-/-	+	-	-/-	+	-	-/-	tdh-/trh1-/trh2-
VP26	Pacific white shrimp	chilled	fresh market	Chatuchak	2018	+	-	-/-	+	-	-/-	+	-	-/-	tdh-/trh1-/trh2-
VP31	Oyster	chilled	fresh market	Lat Krabang	2018	+	-	-/-	+	-	-/-	+	-	-/-	tdh-/trh1-/trh2-
VP39	Oyster	chilled	fresh market	Dusit	2018	+	-	-/-	+	-	-/-	+	-	-/-	tdh-/trh1-/trh2-
VP41	Oyster	chilled	fresh market	Phaya Thai	2018	+	-	-/-	+	-	-/-	+	-	-/-	tdh-/trh1-/trh2-
VP42	Pacific white shrimp	chilled	fresh market	Phaya Thai	2018	+	-	-/-	+	-	-/-	+	-	-/-	tdh-/trh1-/trh2-
VP46	Oyster	chilled	fresh market	Lat Krabang	2018	+	-	-/-	+	-	-/-	+	-	-/-	tdh-/trh1-/trh2-
VP47	Pacific white shrimp	chilled	fresh market	Phaya Thai	2018	-	-	-	-	-	-	-	-	-	-
VP48	Pacific white shrimp	chilled	fresh market	Phra nakhon	2018	-	-	-	-	-	-	-	-	-	-
VP49	Oyster	chilled	fresh market	Chatuchak	2018	-	-	-	-	-	-	-	-	-	-
VP50	Pacific white shrimp	chilled	fresh market	Chatuchak	2018	-	-	-	-	-	-	-	-	-	-
VP51	Pacific white shrimp	chilled	fresh market	Chatuchak	2018	-	-	-	-	-	-	-	-	-	-
VP52	Oyster	chilled	fresh market	Lat Krabang	2018	-	-	-	-	-	-	-	-	-	-
VP53	Oyster	chilled	fresh market	Phaya Thai	2018	-	-	-	-	-	-	-	-	-	-
VP54	Pacific white shrimp	chilled	supermarket	Chatuchak	2018	-	-	-	-	-	-	-	-	-	-
VP55	Oyster	chilled	supermarket	Lat Krabang	2018	-	-	-	-	-	-	-	-	-	-
VP1/1	Mackerel	chilled	fresh market	Chatuchak	2018	+	-	-/-	+	-	-/-	+	-	-/-	tdh-/trh1-/trh2-
VP1/2	Mackerel	chilled	fresh market	Chatuchak	2018	+	-	-/-	+	-	-/-	+	-	-/-	tdh-/trh1-/trh2-
VP3/1	Giant sea perch	chilled	fresh market	Chatuchak	2018	+	-	-/-	+	-	-/-	+	-	-/-	tdh-/trh1-/trh2-
VP9/1	Blue swimming crabs	frozen	supermarket	Chatuchak	2018	-	-	-	-	-	-	-	-	-	-
VP18/2	Ornate Threadfin Bream	chilled	fresh market	Chatuchak	2018	+	-	-/-	+	-	-/-	+	-	-/-	tdh-/trh1-/trh2-
VP23/1	Ornate Threadfin Bream	chilled	fresh market	Chatuchak	2018	+	-	-/-	+	-	-/-	+	-	-/-	tdh-/trh1-/trh2-
VP25/1	Grouper fish	chilled	fresh market	Chatuchak	2018	+	-	-/-	+	-	-/-	+	-	-/-	tdh-/trh1-/trh2-
VP26/1	Splendid squids	frozen	supermarket	Chatuchak	2018	-	-	-	-	-	-	-	-	-	-
VP30/2	Pacific white shrimp	chilled	fresh market	Chatuchak	2018	+	-	-/-	+	-	-/-	+	-	-/-	tdh-/trh1-/trh2-
VP35/2	Splendid Squip	chilled	fresh market	Chatuchak	2018	+	-	-/-	+	-	-/-	+	-	-/-	tdh-/trh1-/trh2-
VP37/2	Oyster	chilled	fresh market	Chatuchak	2018	+	-	-/-	+	-	-/-	+	-	-/-	tdh-/trh1-/trh2-
SS4-002	Pacific white shrimp	chilled	shrimp farm	Eastern Thailand	2013	+	-	-/-	+	-	-/-	+	-	-/-	tdh-/trh1-/trh2-
SS4-003	Pacific white shrimp	chilled	shrimp farm	Eastern Thailand	2013	-	-	-	+	+	-/+	+	+	-/+	tdh+/trh1-/trh2+
SS4-008	Pacific white shrimp	chilled	shrimp farm	Eastern Thailand	2013	+	-	-/-	+	+	-/-	+	+	-/-	tdh+/trh1-/trh2-
SS4-009	Pacific white shrimp	chilled	shrimp farm	Eastern Thailand	2013	+	-	-/-	+	-	-/-	+	-	-/-	tdh-/trh1-/trh2-
SS4-010	Pacific white shrimp	chilled	shrimp farm	Eastern Thailand	2013	+	-	-/-	+	-	-/-	+	-	-/-	tdh-/trh1-/trh2-
SS4-012	Pacific white shrimp	chilled	shrimp farm	Eastern Thailand	2013	+	-	-/-	+	-	-/-	+	-	+/-	tdh-/trh1+/trh2-
SS4-014	Pacific white shrimp	chilled	shrimp farm	Eastern Thailand	2013	+	-	-/-	+	-	-/-	+	-	-/-	tdh-/trh1-/trh2-
SS4-016	Pacific white shrimp	chilled	shrimp farm	Eastern Thailand	2013	+	-	+/-	+	-	+/-	+	+	+/-	tdh+/trh1+/trh2-
SS4-017	Pacific white shrimp	chilled	shrimp farm	Eastern Thailand	2013	+	-	+/-	+	+	+/-	+	+	+/-	tdh+/trh1+/trh2-
SS4-082	Pacific white shrimp	chilled	shrimp farm	Eastern Thailand	2013	+	+	-/+	+	+	-/+	+	+	-/+	tdh+/trh1-/trh2+
SS4-083	Pacific white shrimp	chilled	shrimp farm	Eastern Thailand	2013	+	-	-/+	+	+	-/+	+	+	-/+	tdh+/trh1-/trh2+
SS4-084	Pacific white shrimp	chilled	shrimp farm	Eastern Thailand	2013	+	+	-/+	+	+	-/+	+	+	-/+	tdh+/trh1-/trh2+
SS4-099	Pacific white shrimp	chilled	shrimp farm	Eastern Thailand	2013	+	+	-/+	+	-	-/+	+	+	-/+	tdh+/trh1-/trh2+
SS4-179	Pacific white shrimp	chilled	shrimp farm	Eastern Thailand	2013	+	+	+/-	+	+	+/-	+	+	+/-	tdh+/trh1+/trh2-
SS4-190	Pacific white shrimp	chilled	shrimp farm	Eastern Thailand	2013	+	+	-/+	+	+	-/+	+	+	-/+	tdh+/trh1-/trh2+
SS4-218	Pacific white shrimp	chilled	shrimp farm	Eastern Thailand	2013	+	+	-/+	+	+	-/+	+	+	-/+	tdh+/trh1-/trh2+
VP2154	Pacific white shrimp	chilled	shrimp farm	North Vietnam	2016	+	-	+/-	+	+	+/-	+	+	+/-	tdh+/trh1+/trh2-
VP2158	Pacific white shrimp	chilled	shrimp farm	North Vietnam	2016	+	-	-/-	+	-	-/-	+	-	-/-	tdh-/trh1-/trh2-
VP2162	Pacific white shrimp	chilled	shrimp farm	North Vietnam	2016	+	-	+/-	+	+	+/-	+	+	+/-	tdh+/trh1+/trh2-
S1WS01	Pacific white shrimp	chilled	supermarket	Phaya Thai	2021	+	-	-/-	+	-	-/-	+	-	-/-	tdh-/trh1-/trh2-
S2WS01	Pacific white shrimp	chilled	supermarket	Ratchathewi	2021	+	-	-/-	+	-	-/-	+	-	-/-	tdh-/trh1-/trh2-
S3WSB01	Pacific white shrimp	chilled	supermarket	Phaya Thai	2022	+	+	-/-	+	+	-/+	+	+	-/+	tdh+/trh1-/trh2+
S3WSB02	Pacific white shrimp	chilled	supermarket	Phaya Thai	2022	+	+	-/-	+	-	-/-	+	-	-/-	tdh-/trh1-/trh2-
S3BP03	Black prawn	chilled	supermarket	Phaya Thai	2022	+	-	-/+	+	-	+/+	+	-	+/+	tdh-/trh1+/trh2+
S3GS04	Tentacle giant squid	chilled	supermarket	Phaya Thai	2022	-	-	-	-	-	-	-	-	-	-
S3BSC05	Blue swimming crab	chilled	supermarket	Phaya Thai	2022	-	-	-	-	-	-	-	-	-	-
S3SPS06	Spotten Babylon snail	chilled	supermarket	Phaya Thai	2022	-	-	-	-	-	-	-	-	-	-
S3CK07	Cockle	frozen	supermarket	Phaya Thai	2022	-	-	-	-	-	-	-	-	-	-
S3MS08	Mussel	frozen	supermarket	Phaya Thai	2022	-	-	-	-	-	-	-	-	-	-
S3OY09	Oyster	chilled	supermarket	Phaya Thai	2022	+	-	-/-	+	+	-/-	+	+	+/-	tdh+/trh1+/trh2-
S3WSS10	Pacific white shrimp	chilled	supermarket	Phaya Thai	2022	+	-	-/-	+	-	-/-	+	-	-/-	tdh-/trh1-/trh2-
S3DO11	Dollfus octopus	chilled	supermarket	Phaya Thai	2022	-	-	-	-	-	-	-	-	-	-
S3SS12	Splendid Squip	chilled	supermarket	Phaya Thai	2022	-	-	-	-	-	-	-	-	-	-
S4SBS01	Spotten Babylon snail	chilled	supermarket	Yan Nawa	2022	-	-	-	+	-	-/-	+	-	-/-	tdh-/trh1-/trh2-
S4GP02	Grouper fish	chilled	supermarket	Yan Nawa	2022	-	-	-	-	-	-	-	-	-	-
S4WS03	Pacific white Shrimps	chilled	supermarket	Yan Nawa	2022	+	-	-/-	+	-	-/-	+	-	-/-	tdh-/trh1-/trh2-
S4MS04	Mussel	chilled	supermarket	Yan Nawa	2022	+	-	-/-	+	-	-/-	+	-	-/-	tdh-/trh1-/trh2-
S5HK01	Hotate Kaibashira sashimi	frozen	supermarket	Watthana	2022	-	-	-	-	-	-	-	-	-	-
S5WO02	Wasabi octopus	frozen	supermarket	Watthana	2022	-	-	-	-	-	-	-	-	-	-
S5HMS03	Hon Maguro Chutoro sashimi	chilled	supermarket	Watthana	2022	-	-	-	-	-	-	-	-	-	-
S5SMS04	Atlantic Salmon sashimi	chilled	supermarket	Watthana	2022	-	-	-	-	-	-	-	-	-	-
S6SS01	Splendid Squip	chilled	supermarket	Khan Na Yao	2022	+	-	-/-	+	-	-/-	+	-	-/-	tdh-/trh1-/trh2-
S6GP02	Grouper fish	chilled	supermarket	Khan Na Yao	2022	-	-	-	-	-	-	-	-	-	-
S6OY03	Oyster	chilled	supermarket	Khan Na Yao	2022	+	-	-/-	+	-	-/-	+	-	-/-	tdh-/trh1-/trh2-
S7GSP04	Giant sea perch fillet	chilled	supermarket	Khan Na Yao	2022	-	-	-	-	-	-	-	-	-	-
F1SS01	Splendid squid	chilled	fresh market	Nong Khaem	2022	+	-	-/-	+	-	-/-	+	-	-/-	tdh-/trh1-/trh2-
F1BS02	Baby shell	chilled	fresh market	Nong Khaem	2022	+	-	-/-	+	-	-/-	+	-	-/-	tdh-/trh1-/trh2-
F1MS03	Mussel	chilled	fresh market	Nong Khaem	2022	+	-	-/-	+	+	+/+	+	+	+/+	tdh+/trh1+/trh2+
F1BSC04	Blue swimming crab	chilled	fresh market	Nong Khaem	2022	+	-	-/-	+	-	-/-	+	-	-/-	tdh-/trh1-/trh2-
F1RSC05	Rea sea crab	chilled	fresh market	Nong Khaem	2022	+	-	-/-	+	-	-/-	+	-	-/-	tdh-/trh1-/trh2-
F1WS06	Pacific white shrimp	chilled	fresh market	Nong Khaem	2022	+	-	-/-	+	-	-/-	+	-	-/-	tdh-/trh1-/trh2-
F2BSC01	Blue swimming crab	chilled	fresh market	Pathum Wan	2022	+	-	-/-	+	-	-/+	+	-	-/+	tdh-/trh1-/trh2+
F2CK02	Cockle	chilled	fresh market	Pathum Wan	2022	+	-	-/+	+	+	-/+	+	+	-/+	tdh+/trh1-/trh2+
F2OY03	Oyster	chilled	fresh market	Pathum Wan	2022	+	-	-/+	+	-	-/+	+	-	-/+	tdh-/trh1-/trh2+
F2WS04	Pacific white shrimp	chilled	fresh market	Pathum Wan	2022	+	-	-/-	+	-	-/-	+	-	-/-	tdh-/trh1-/trh2-
F2GSP05	Giant sea perch	chilled	fresh market	Pathum Wan	2022	+	-	-/-	+	-	-/-	+	-	-/-	tdh-/trh1-/trh2-
F3CK01	Cockle	chilled	fresh market	Sathon	2022	+	-	-/-	+	+	-/+	+	+	-/+	tdh+/trh1-/trh2+
F3WS02	Pacific white shrimp	chilled	fresh market	Sathon	2022	+	-	-/-	+	-	-/-	+	-	-/-	tdh-/trh1-/trh2-
F3MS03	Mussel	chilled	fresh market	Sathon	2022	+	-	-/-	+	-	-/+	+	-	-/+	tdh-/trh1-/trh2+
F3SS04	Splendid squid	chilled	fresh market	Sathon	2022	+	-	-/-	+	-	-/-	+	-	-/-	tdh-/trh1-/trh2-
F4GSP01	Giant sea perch	chilled	fresh market	Bang Sue	2022	-	-	-	-	-	-	-	-	-	-
F4CK02	Cockle	chilled	fresh market	Bang Sue	2022	+	+	+/+	+	+	+/+	+	+	+/+	tdh+/trh1+/trh2+
F4MS03	Mussel	chilled	fresh market	Bang Sue	2022	+	-	-/-	+	-	-/-	+	-	-/-	tdh-/trh1-/trh2-
F4OY04	Oyster	chilled	fresh market	Bang Sue	2022	+	-	-/-	+	-	-/-	+	-	-/-	tdh-/trh1-/trh2-
F4WS05	Pacific white shrimp	chilled	fresh market	Bang Sue	2022	+	-	-/-	+	-	-/-	+	-	-/-	tdh-/trh1-/trh2-
F4GP06	Grouper fish	chilled	fresh market	Bang Sue	2022	+	-	-/-	+	-	-/-	+	-	-/-	tdh-/trh1-/trh2-
F5CK01	Cockle	chilled	fresh market	Bang Khae	2022	+	-	-/-	+	-	-/-	+	-	+/-	tdh-/trh1+/trh2-
F5MS02	Mussel	chilled	fresh market	Bang Khae	2022	+	-	-/-	+	+	-/+	+	+	-/+	tdh+/trh1-/trh2+
F5OY03	Oyster	chilled	fresh market	Bang Khae	2022	+	-	+/-	+	+	+/+	+	+	+/+	tdh+/trh1+/trh2+
F5BSC04	Blue swimming crab	chilled	fresh market	Bang Khae	2022	+	-	-/-	+	-	-/-	+	-	-/-	tdh-/trh1-/trh2-
F5GSP05	Giant sea perch	chilled	fresh market	Bang Khae	2022	+	-	-/-	+	-	-/-	+	-	-/-	tdh-/trh1-/trh2-
F5GP06	Grouper fish	chilled	fresh market	Bang Khae	2022	+	-	-/-	+	-	-/-	+	-	-/-	tdh-/trh1-/trh2-
